# Supplementary material
Source: publisher figshare collection journal article supplement (https://tandf.figshare.com/ndownloader/files/14133722)
Supplement: Supplementary file 1 [file 14133722]

**Supporting Information**

**Convenient and efficient Suzuki–Miyaura and Heck–Mizoroki cross*–*coupling reactions catalyzed by 1,3,4–trisubstituted–1,2,3–triazolium iodide and palladium salt systems**

Shahini C. R.a, Gautam Achara, Srinivasa Budagumpia, Ramesh B. Dateera, Helge Müller–Bunzb, Matthias Tackeb, Siddappa A. Patila*

*aCentre for Nano and Material Sciences, Jain University, Jain Global Campus, Kanakapura, Ramanagaram, Bangalore 562112, India*

*bSchool of Chemistry, University College Dublin, Belfield, Dublin 4, Ireland*

*Corresponding author: Dr. Siddappa A. Patil

Tel: +91 80 27577254

Fax: +91 80 27577211

*E–mail:* p.siddappa@jainuniversity.ac.in / patilsiddappa@gmail.com

**1H- NMR spectra of coupled products**


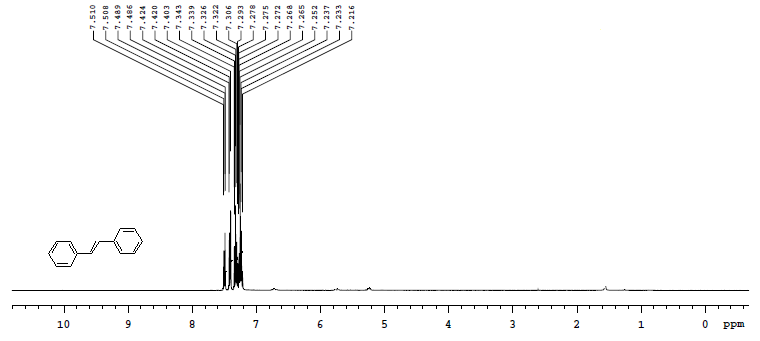


Figure SP1. 1H NMR spectrum of 1,2-diphenylethene.

**
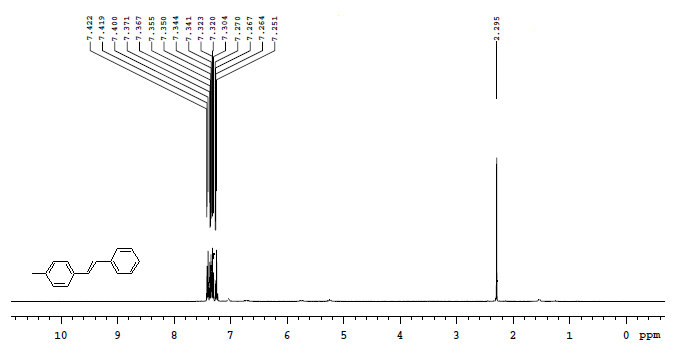
**

Figure SP2.1H NMR spectrum of 1-methyl-4-styrylbenzene.


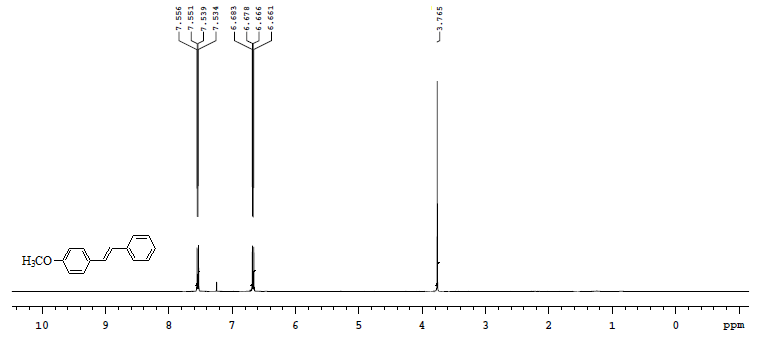


Figure SP3. 1H NMR spectrum of 1-methoxy-4-styrylbenzene.


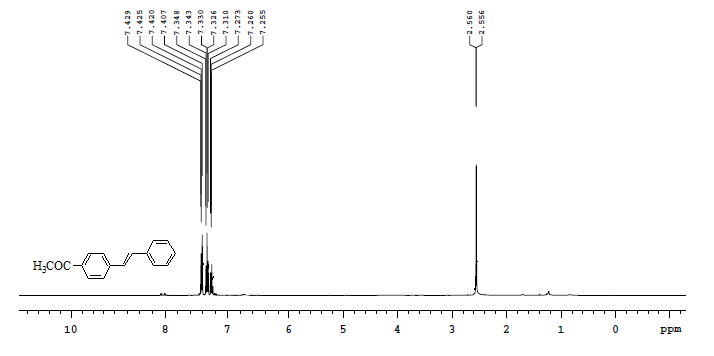


Figure SP4. 1H NMR spectrum of 1-(4-styrylphenyl)ethanone.


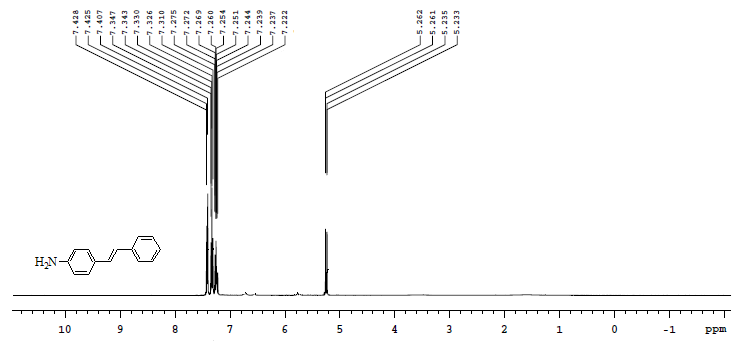


Figure SP5. 1H NMR spectrum of 4-styrylbenzenamine.


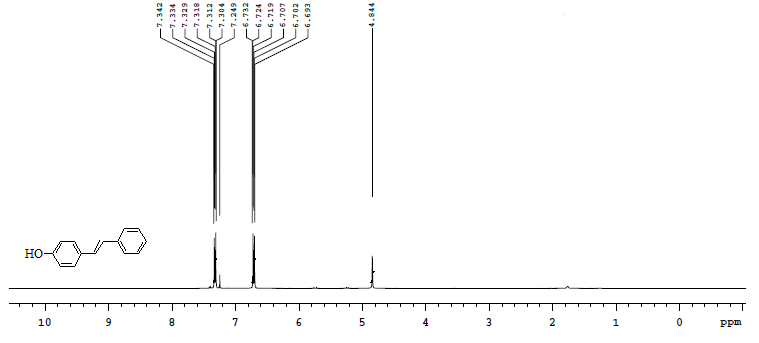


Figure SP6. 1H NMR spectrum of 4-styrylphenol.


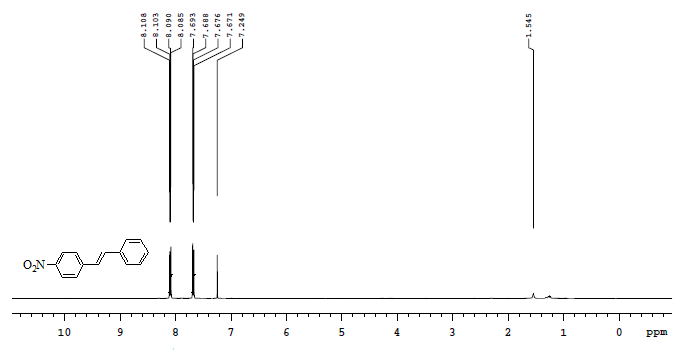


Figure SP7. 1H NMR spectrum of 1-(4-nitrostyryl)benzene.


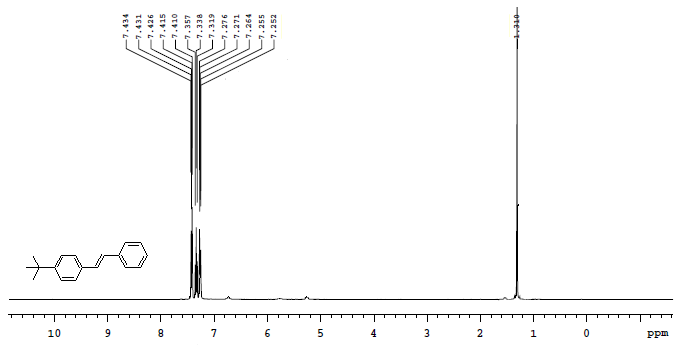


Figure SP8. 1H NMR spectrum of 1-tert-butyl-4-styrylbenzene.
